# Supplementary material for: Sexual dimorphism in the nutritional requirement for adult lifespan in Drosophila melanogaster
Source: PubMed Central journal article supplement (PMC7059147; doi:10.1111/acel.13120), 2020-02-18
Supplement: ACEL-19-e13120-s001.pdf [file ACEL-19-e13120-s001.pdf]

## Supplemental Information

### Sexual dimorphism in the nutritional requirement for adult lifespan in *Drosophila melanogaster*

Qi Wu, Guixiang Yu, Xingyi Cheng, Yue Gao, Xiaolan Fan, Deying Yang, Meng Xie, Tao Wang,  
Matthew D.W. Piper, Mingyao Yang

#### Supplemental Data

Figure S1. Lifespan curves of Figure 1c-g

Figure S2. Lifespan curves of Figure 2a-f.

Figure S3 Lifespan curves.

Figure S4 Lifespan curves of Figure 3a-b.

Figure S5 Lifespan curves.

Table S1. Lifespan data for Figure S1a.

Table S2. Lifespan data for Figure S1b.

Table S3. Lifespan data for Figure S1c.

Table S4. Lifespan data for Figure S1d.

Table S5. Lifespan data for Figure S1e.

Table S6. Lifespan data for Figure S2a.

Table S7. Lifespan data for Figure S2b.

Table S8. Lifespan data for Figure S2c

Table S9. Lifespan data for Figure S2d.

Table S10. Lifespan data for Figure S2e.

Table S11. Lifespan data for Figure S2f.

Table S12. Lifespan data for Figure S3a

Table S13. Lifespan data for Figure S3b.

Table S14. Lifespan data for Figure S4b.

Table S15. Lifespan data for Figure S4c.

Table S16. Lifespan data for Figure S4d.

Table S17. Lifespan data for Figure S4e.

Table S18. Lifespan data for Figure S4f.

Table S19. Lifespan data for Figure S5

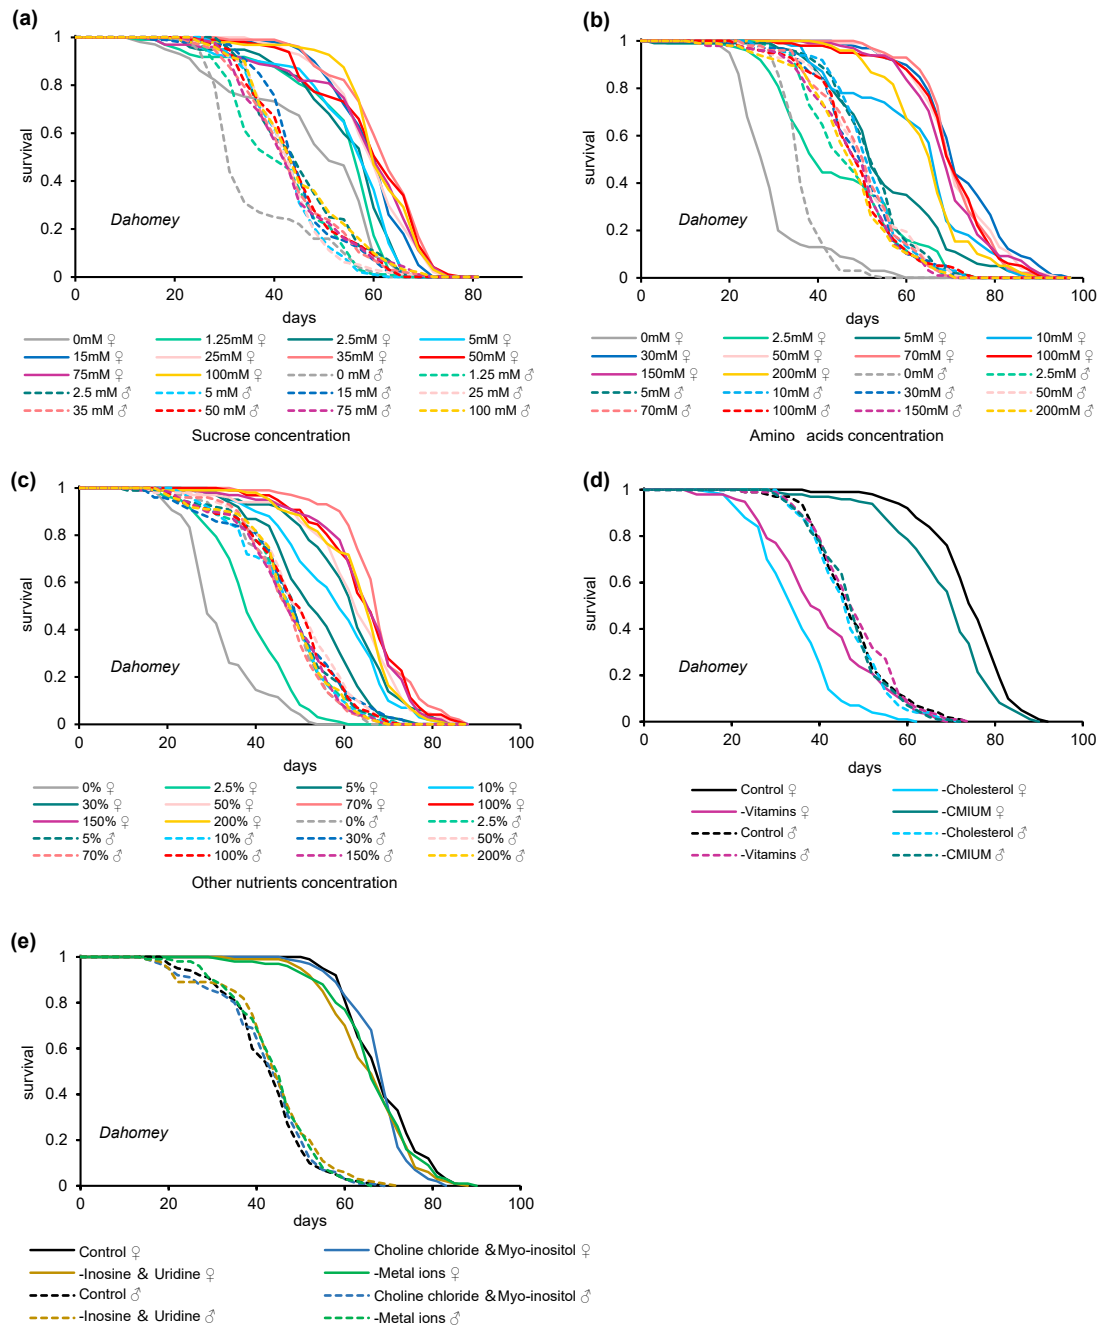

**Figure S1. Lifespan curves of Figure 1c-g. (a-c)** Effect of manipulating sugar (a), total amino acid (b) and other nutrients level (c) on lifespan in both sex. **(d)** The effect of removing dietary cholesterol, B-group vitamins or other ingredients include choline, myo-inositol, uridine, inosine and metal ions (labeled as CMIUM in the figure) on lifespan in both sex. **(e)** Effect of omitting choline and myo-inositol (C&M), inosine and uridine (I&U) or metal ions on female day 8 fecundity and lifespan in both sex of dahomey strain. (n = 100 flies per treatment for lifespans, see statistical analysis of lifespan data in Supplemental Table S1-S8)

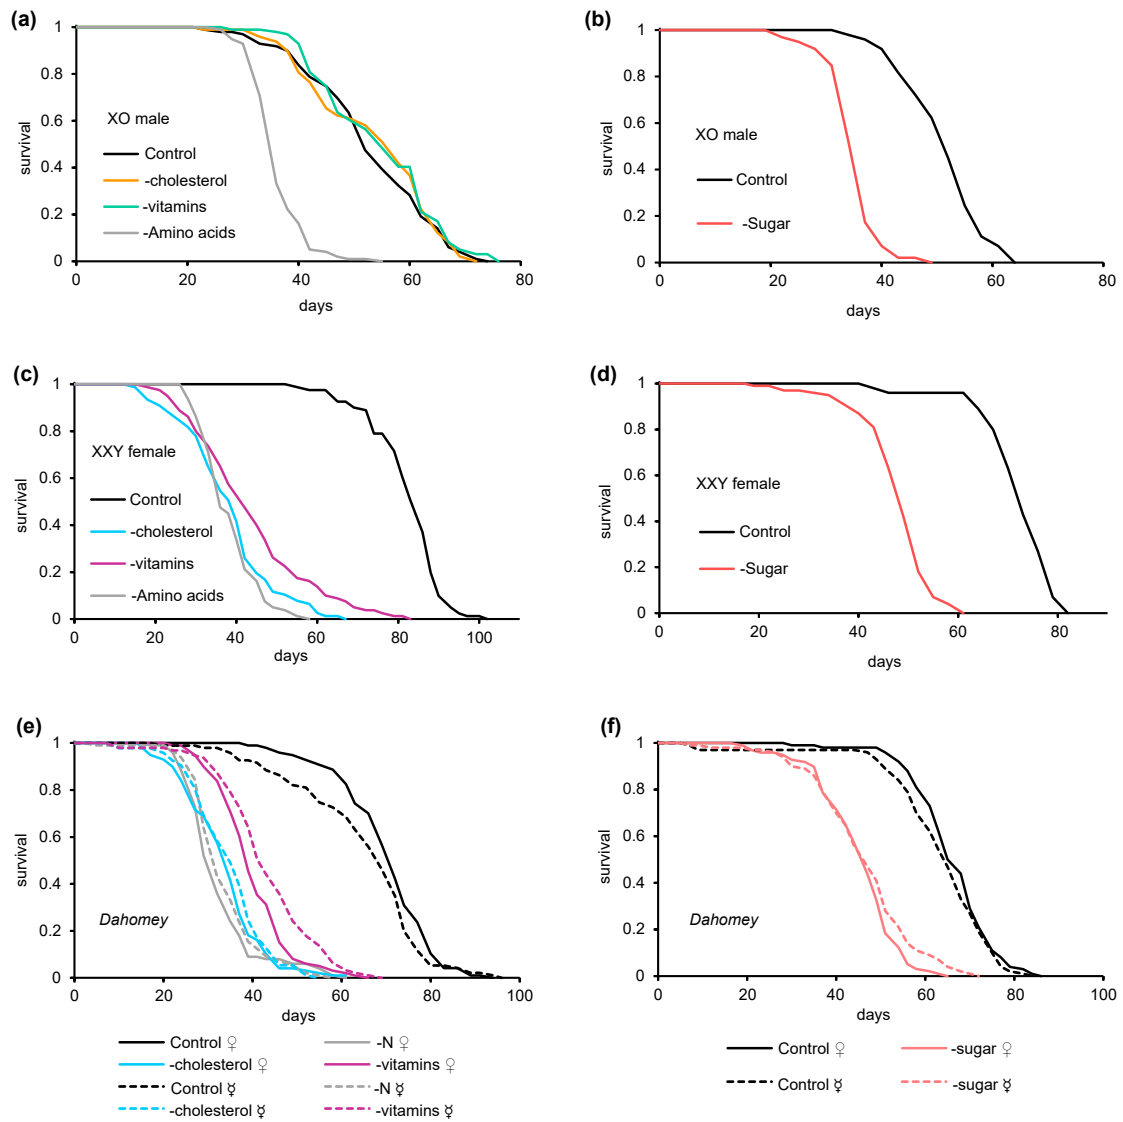

**Figure S2. Lifespan curves of Figure 2a-f.**

**(a-b)** Effect of omitting amino acid (N), cholesterol (chol), B-group vitamins (vit) or sucrose (S) on lifespan of XO males. **(c-d)** Effect of omitting N, chol, vit or S on lifespan of XXY females. **(e-f)** Effect of omitting N, chol, vit or S on lifespan of mated wild type *Dahomey* females (♀) and virgin females (♂). (n = 100 flies per treatment for lifespans, see statistical analysis of lifespan data in Supplemental Table S6-S11)

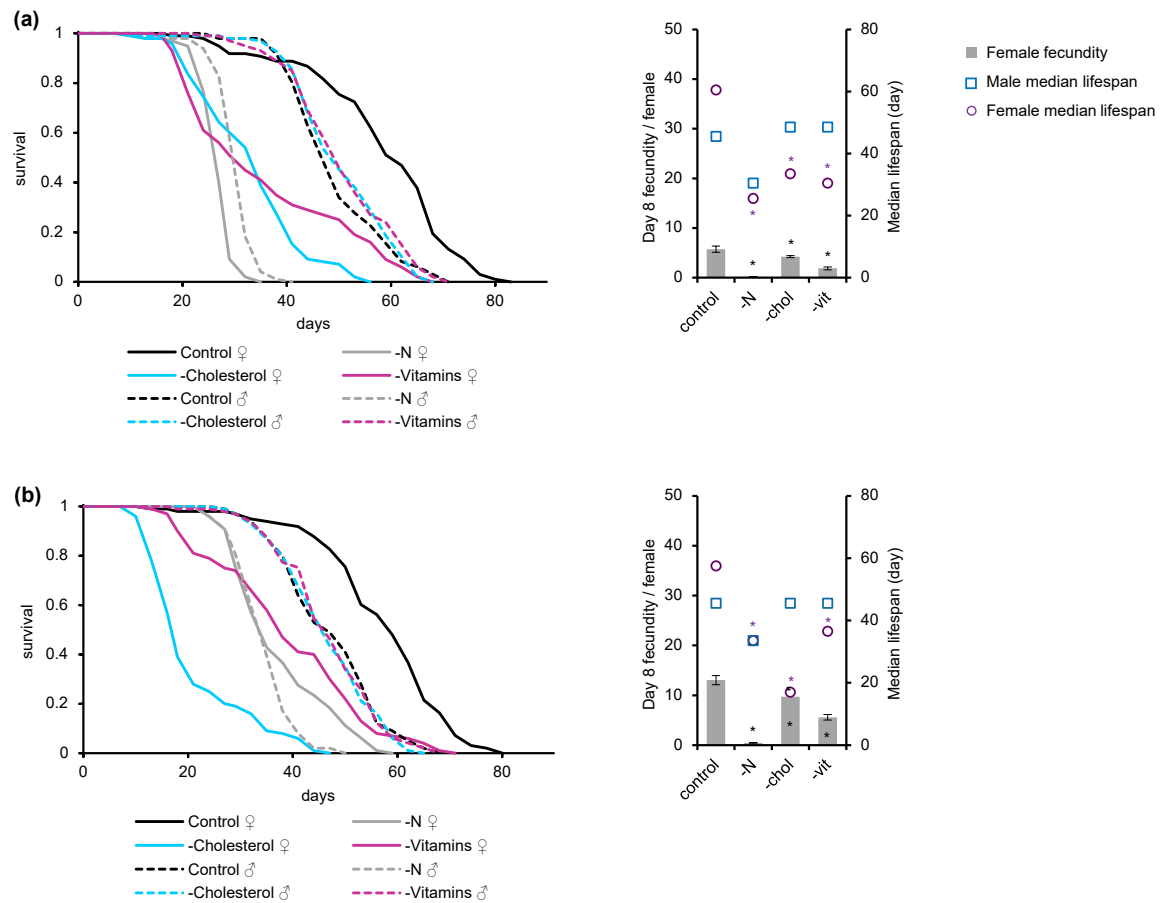

**Figure S3. Lifespan curves. (a-b)** Effect of omitting amino acids, cholesterol or B-group vitamins on female day 8 fecundity and lifespan in both sex of *w1118* (a) and *Canton S* (b) strains. (n = 100 flies per treatment for lifespans and n = 10 biological replicates for egg laying in all trials, error bars represent egg-laying mean  $\pm$  s.e.m. Within each phenotype, \* indicate  $P < 0.05$  versus complete holidic diet control. Lifespan differences were assessed using Cox regression and egg-laying differences were assessed by one-way ANOVA followed by Tukey's multiple comparison. See statistical analysis of lifespan data in Supplemental Table S12-S13)

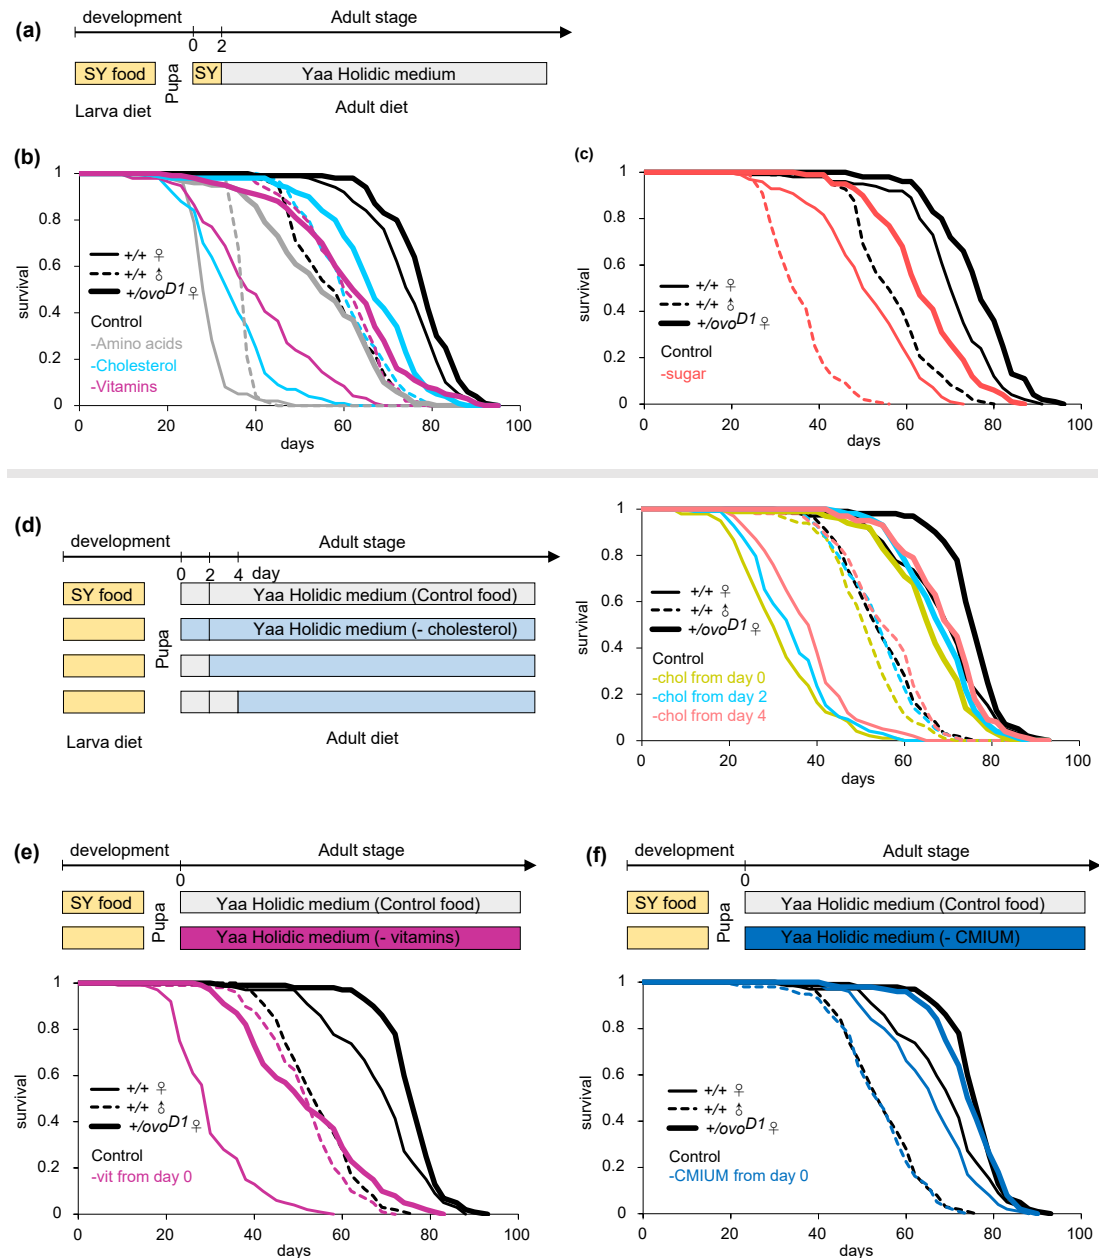

**Figure S4. Lifespan curves of Figure 3a-b.**

**(a-c)** Effect of omitting amino acids (N), cholesterol (chol), B-group vitamins (vit) or sucrose (S) from the adult diet from day 2 post-eclosion on lifespan of wild type females and males and *ovo<sup>D1</sup>* mutant females. **(d)** Effect of omitting cholesterol in adult diet from day 0, 2, 4 post-eclosion on lifespan of wild type females and males and *ovo<sup>D1</sup>* mutant females. **(e-f)** Effect of omitting vitamins **(e)** or other components **(f)** include choline, myo-inositol, uridine, inosine, metals (labeled as CMIUM in the figure) in adult diet immediately from post-eclosion on lifespan of wild type females and males and *ovo<sup>D1</sup>* mutant females. *ovo<sup>D1</sup>* v[24]/C(1)DX, y[1] w[1] f[1] males (Bloomington stock number 1309) were crossed with Dahomey females to obtain +/ovo<sup>D1</sup> ♀ and +/+ ♂; +/+ ♀ in the Figure were Dahomey females. n = 100 flies per treatment for lifespans, see statistical analysis of lifespan data in Supplemental Table S14-S18)

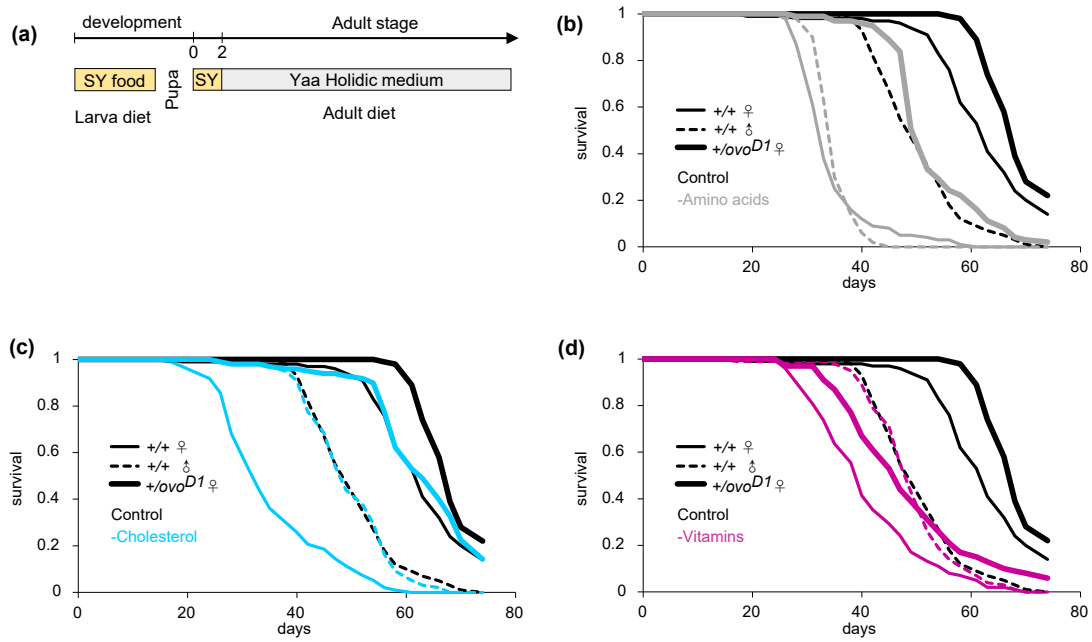

**Figure S5. Lifespan curves.**

*ovo<sup>D1</sup>* mutant lifespan curves of another genetic background.

**(a-d)** Effect of omitting amino acids **(b)**, cholesterol **(c)**, B-group vitamins **(d)** from the adult diet from day 2 post-eclosion on lifespan of wild type females and males and *ovo<sup>D1</sup>* mutant females. (*ovo[D1] v[24]/C(1)DX, y[1] w[1] f[1]*) (Bloomington stock 1309) males were crossed with Canton S females to obtain  $+/ovo^{D1}$  ♀ and  $+/+$  ♂;  $+/+$  ♀ in the Figure were Canton S females.  $n = 100$  flies per treatment for lifespans, see statistical analysis of lifespan data in Supplemental Table S19)

**Table S1. Lifespan data for Figure S1a.**

| Females                           |          |          |          |            |         |         |         |                   |         |         |
|-----------------------------------|----------|----------|----------|------------|---------|---------|---------|-------------------|---------|---------|
| Sucrose concentration             | 0mM      | 1.25mM   | 2.5mM    | 5mM        | 15mM    | 25mM    | 35mM    | 50mM<br>(control) | 75mM    | 100mM   |
| Number of death                   | 101      | 98       | 97       | 99         | 100     | 97      | 101     | 97                | 99      | 96      |
| Number of censor                  | 0        | 1        | 0        | 0          | 0       | 2       | 0       | 0                 | 1       | 1       |
| median (d)                        | 49.5     | 55.5     | 58.5     | 58.5       | 61.5    | 61.5    | 62.5    | 61.5              | 61.5    | 61.5    |
| mean (d)                          | 47.8     | 53.4     | 54.9     | 55.4       | 59.5    | 60.1    | 62.3    | 60.0              | 58.3    | 61.6    |
| maximum (d)                       | 58.5     | 61.5     | 64.5     | 64.5       | 67.5    | 70.5    | 70.5    | 70.5              | 70.5    | 70.5    |
| log-rank (vs control)             | 1.64E-12 | 2.21E-09 | 7.61E-07 | 2.90E-06   | 0.04853 | 0.22323 | 0.46135 |                   | 0.35854 | 0.88431 |
| Cox reg (vs control)              | 6.66E-15 | 1.67E-09 | 2E-06    | 0.00001    | 0.06657 | 0.24275 | 0.54105 |                   | 0.45343 | 0.85094 |
| Males                             |          |          |          |            |         |         |         |                   |         |         |
| Sucrose concentration             | 0mM      | 1.25mM   | 2.5mM    | 5mM        | 15mM    | 25mM    | 35mM    | 50mM<br>(control) | 75mM    | 100mM   |
| Number of death                   | 100      | 98       | 100      | 97         | 99      | 98      | 97      | 97                | 93      | 100     |
| Number of censor                  | 0        | 2        | 0        | 3          | 1       | 1       | 0       | 1                 | 1       | 0       |
| median (d)                        | 26.5     | 35.5     | 41.5     | 40         | 41.5    | 40      | 40      | 40                | 40      | 40      |
| mean (d)                          | 33.6     | 39.0     | 43.3     | 40.7       | 42.9    | 40.8    | 41.4    | 42.4              | 41.5    | 43.3    |
| maximum (d)                       | 52.5     | 52.5     | 61.5     | 52.5       | 58.5    | 52.5    | 58.5    | 58.5              | 60      | 61.5    |
| log-rank (vs control)             | 1.28E-06 | 0.04022  | 0.37303  | 0.04779    | 0.82308 | 0.1656  | 0.67211 |                   | 0.83317 | 0.39777 |
| Cox reg (vs control)              | 9.85E-07 | 0.07050  | 0.48508  | 0.14052    | 0.88259 | 0.19101 | 0.77221 |                   | 0.86408 | 0.44713 |
| Females and Males                 |          |          |          |            |         |         |         |                   |         |         |
| Cox regression (sucrose)          |          |          |          | p < 0.0001 |         |         |         |                   |         |         |
| Cox regression (gender)           |          |          |          | p < 0.0001 |         |         |         |                   |         |         |
| Cox regression (sucrose × gender) |          |          |          | p = 0.0003 |         |         |         |                   |         |         |

**Table S2. Lifespan data for Figure S1b.**

| Females                               |          |          |          |            |         |         |         |                 |         |         |
|---------------------------------------|----------|----------|----------|------------|---------|---------|---------|-----------------|---------|---------|
| Amino acids concentration             | 0mM      | 2.5mM    | 5mM      | 10mM       | 30mM    | 50mM    | 70mM    | 100mM (control) | 150mM   | 200mM   |
| Number of death                       | 100      | 99       | 100      | 100        | 98      | 100     | 99      | 100             | 98      | 98      |
| Number of censor                      | 0        | 0        | 0        | 0          | 2       | 0       | 1       | 0               | 2       | 2       |
| median (d)                            | 28       | 39.5     | 51       | 66         | 70      | 70      | 70      | 70              | 68      | 66      |
| mean (d)                              | 30.2     | 45.2     | 55.5     | 62.9       | 72.8    | 71.4    | 71.5    | 70.4            | 69.8    | 65.3    |
| maximum (d)                           | 50       | 68       | 77.5     | 82         | 89      | 84.5    | 81      | 82              | 87      | 83      |
| log-rank (vs control)                 | 1.54E-49 | 5.29E-28 | 1.09E-10 | 0.00121    | 0.05532 | 0.53397 | 0.98101 |                 | 0.5588  | 0.0002  |
| Cox reg (vs control)                  | 3.44E-94 | 9.06E-31 | 3.30E-10 | 0.00461    | 0.10408 | 0.58151 | 0.93844 |                 | 0.76359 | 0.00260 |
| Males                                 |          |          |          |            |         |         |         |                 |         |         |
| Amino acids concentration             | 0mM      | 2.5mM    | 5mM      | 10mM       | 30mM    | 50mM    | 70mM    | 100mM (control) | 150mM   | 200mM   |
| Number of death                       | 98       | 96       | 100      | 98         | 98      | 98      | 99      | 98              | 97      | 96      |
| Number of censor                      | 1        | 2        | 0        | 2          | 2       | 2       | 0       | 1               | 3       | 4       |
| median (d)                            | 34.5     | 46       | 51       | 51         | 48.5    | 51      | 51      | 48.5            | 48.5    | 46      |
| mean (d)                              | 36.7     | 47.6     | 52.6     | 52.0       | 50.0    | 50.4    | 50.2    | 49.3            | 48.2    | 47.5    |
| maximum (d)                           | 44       | 65       | 65       | 63         | 69      | 63      | 64      | 65              | 63      | 64      |
| log-rank (vs control)                 | 1.56E-25 | 0.26459  | 0.06277  | 0.16848    | 0.90348 | 0.50271 | 0.68805 |                 | 0.59805 | 0.27663 |
| Cox reg (vs control)                  | 8.14E-32 | 0.27016  | 0.13287  | 0.31148    | 0.91619 | 0.59452 | 0.83564 |                 | 0.47737 | 0.28751 |
| Females and Males                     |          |          |          |            |         |         |         |                 |         |         |
| Cox regression (amino acids)          |          |          |          | p < 0.0001 |         |         |         |                 |         |         |
| Cox regression (gender)               |          |          |          | p < 0.0001 |         |         |         |                 |         |         |
| Cox regression (amino acids × gender) |          |          |          | p < 0.0001 |         |         |         |                 |         |         |



**Table S3. Lifespan data for Figure S1c.**

| Females                                   |          |          |          |            |         |         |         |                |         |         |
|-------------------------------------------|----------|----------|----------|------------|---------|---------|---------|----------------|---------|---------|
| Other nutrients concentration             | 0%       | 2.50%    | 5%       | 10%        | 30%     | 50%     | 70%     | 100% (control) | 150%    | 200%    |
| Number of death                           | 96       | 97       | 99       | 100        | 100     | 100     | 101     | 97             | 100     | 103     |
| Number of censor                          | 1        | 0        | 0        | 0          | 0       | 0       | 0       | 2              | 1       | 0       |
| median (d)                                | 27       | 37       | 53       | 57.5       | 62      | 62      | 67      | 64.5           | 64.5    | 64.5    |
| mean (d)                                  | 32.6     | 39.3     | 53.3     | 58.3       | 61.1    | 62.5    | 68.2    | 65.1           | 64.6    | 63.6    |
| maximum (d)                               | 49       | 51       | 66       | 76         | 78      | 76      | 83      | 78             | 77      | 76      |
| log-rank (vs control)                     | 1.90E-46 | 3.53E-41 | 7.74E-14 | 0.00021    | 0.01154 | 0.09396 | 0.13455 |                | 0.64654 | 0.12646 |
| Cox reg (vs control)                      | 1.86E-86 | 7.09E-61 | 1.33E-14 | 0.00033    | 0.01796 | 0.14846 | 0.21677 |                | 0.71038 | 0.19596 |
| Males                                     |          |          |          |            |         |         |         |                |         |         |
| Other nutrients concentration             | 0%       | 2.50%    | 5%       | 10%        | 30%     | 50%     | 70%     | 100% (control) | 150%    | 200%    |
| Number of death                           | 100      | 99       | 99       | 100        | 99      | 100     | 100     | 100            | 98      | 99      |
| Number of censor                          | 0        | 0        | 0        | 0          | 0       | 0       | 0       | 0              | 1       | 1       |
| median (d)                                | 46.5     | 46.5     | 49       | 46.5       | 49      | 49      | 46.5    | 49             | 46.5    | 46.5    |
| mean (d)                                  | 47.3     | 47.8     | 48.6     | 47.4       | 48.5    | 50.3    | 47.4    | 49.0           | 47.5    | 48.0    |
| maximum (d)                               | 60       | 64.5     | 64.5     | 62         | 68      | 67      | 60      | 64.5           | 59      | 61      |
| log-rank (vs control)                     | 0.06458  | 0.41039  | 0.59274  | 0.22325    | 0.83381 | 0.58715 | 0.04877 |                | 0.17203 | 0.23679 |
| Cox reg (vs control)                      | 0.11111  | 0.43670  | 0.63227  | 0.26179    | 0.77260 | 0.66141 | 0.08306 |                | 0.21959 | 0.31061 |
| Females and Males                         |          |          |          |            |         |         |         |                |         |         |
| Cox regression (other nutrients)          |          |          |          | p < 0.0001 |         |         |         |                |         |         |
| Cox regression (gender)                   |          |          |          | p < 0.0001 |         |         |         |                |         |         |
| Cox regression (other nutrients × gender) |          |          |          | p < 0.0001 |         |         |         |                |         |         |

**Table S4. Lifespan data for Figure S1d.**

|                                       | Female     |              |           |         | Male    |              |           |         |
|---------------------------------------|------------|--------------|-----------|---------|---------|--------------|-----------|---------|
| food type                             | control    | -cholesterol | -vitamins | -CMIUM  | control | -cholesterol | -vitamins | -CMIUM  |
| Number of death                       | 100        | 100          | 96        | 98      | 100     | 100          | 100       | 99      |
| Number of censor                      | 0          | 0            | 2         | 1       | 0       | 0            | 0         | 0       |
| median (d)                            | 75         | 34.5         | 38        | 70.5    | 46      | 46           | 47        | 46      |
| mean (d)                              | 74.6       | 35.1         | 41.2      | 69.2    | 48.2    | 47.2         | 48.9      | 47.9    |
| maximum (d)                           | 86         | 49           | 61        | 82      | 65      | 59           | 62        | 61      |
| log-rank (vs control)                 |            | 1.85E-51     | 1.99E-46  | 0.00092 |         | 0.38543      | 0.58864   | 0.64000 |
| Cox reg (vs control)                  |            | 6.46E-59     | 2.00E-46  | 0.00370 |         | 0.36754      | 0.63185   | 0.66676 |
| Cox regression (cholesterol x gender) | p < 0.0001 |              |           |         |         |              |           |         |
| Cox regression (vitamins x gender)    | p < 0.0001 |              |           |         |         |              |           |         |
| Cox regression (CMIUM x gender)       | p = 0.485  |              |           |         |         |              |           |         |

**Table S5. Lifespan data for Figure S1e.**

|                       | Female  |                        |                       |             | Male    |                        |                       |             |
|-----------------------|---------|------------------------|-----------------------|-------------|---------|------------------------|-----------------------|-------------|
| food type             | Control | -Choline<br>& inositol | -Inosine<br>& Uridine | -Metal ions | Control | -Choline<br>& inositol | -Inosine<br>& Uridine | -Metal ions |
| Number of death       | 100     | 100                    | 100                   | 100         | 100     | 100                    | 100                   | 100         |
| Number of censor      | 0       | 0                      | 0                     | 0           | 0       | 0                      | 0                     | 0           |
| median (d)            | 67.5    | 67.5                   | 64.5                  | 64.5        | 43.5    | 43.5                   | 43.5                  | 43.5        |
| mean (d)              | 68.9    | 68.4                   | 66.2                  | 66.8        | 43.1    | 43.0                   | 44.6                  | 44.7        |
| maximum (d)           | 81      | 77.5                   | 75                    | 80          | 58      | 58                     | 61.5                  | 53.5        |
| log-rank (vs control) |         | 0.19544                | 0.09399               | 0.35887     |         | 0.64696                | 0.11436               | 0.28666     |
| Cox reg (vs control)  |         | 0.31312                | 0.14043               | 0.38626     |         | 0.67957                | 0.14475               | 0.32686     |

**Table S6. Lifespan data for Figure S2a.**

|                       | XO male |              |           |              |
|-----------------------|---------|--------------|-----------|--------------|
| food type             | Control | -cholesterol | -vitamins | -Amino acids |
| Number of death       | 99      | 99           | 99        | 100          |
| Number of censor      | 1       | 0            | 1         | 0            |
| median (d)            | 50.5    | 56.5         | 53.5      | 34.5         |
| mean (d)              | 53.0    | 53.7         | 54.9      | 36.6         |
| maximum (d)           | 66      | 68           | 66        | 41           |
| log-rank (vs control) |         | 0.68349      | 0.20064   | 1.32E-31     |
| Cox reg (vs control)  |         | 0.67751      | 0.23459   | 2.51E-34     |

**Table S7. Lifespan data for Figure S2b.**

|                       | XO male |          |
|-----------------------|---------|----------|
| food type             | Control | -sucrose |
| Number of death       | 98      | 98       |
| Number of censor      | 1       | 0        |
| median (d)            | 50.5    | 35.5     |
| mean (d)              | 51.7    | 35.5     |
| maximum (d)           | 62.5    | 38.5     |
| log-rank (vs control) |         | 3.85E-40 |
| Cox reg (vs control)  |         | 3.92E-27 |

**Table S8. Lifespan data for Figure S2c.**

|                       | XXY female |              |           |              |
|-----------------------|------------|--------------|-----------|--------------|
| food type             | Control    | -cholesterol | -vitamins | -Amino acids |
| Number of death       | 81         | 77           | 80        | 80           |
| Number of censor      | 0          | 3            | 0         | 0            |
| median (d)            | 84.5       | 39           | 41        | 34.5         |
| mean (d)              | 82.7       | 38.4         | 43.9      | 38.5         |
| maximum (d)           | 90         | 59           | 69        | 46           |
| log-rank (vs control) |            | 6.21E-43     | 2.51E-38  | 1.27E-43     |
| Cox reg (vs control)  |            | 2.98E-36     | 2.07E-31  | 6.85E-38     |

**Table S9. Lifespan data for Figure S2d.**

|                       | XXY female |          |
|-----------------------|------------|----------|
| food type             | Control    | -sucrose |
| Number of death       | 100        | 100      |
| Number of censor      | 0          | 0        |
| median (d)            | 71.5       | 47.5     |
| mean (d)              | 72.5       | 48.3     |
| maximum (d)           | 77.5       | 53.5     |
| log-rank (vs control) |            | 1.18E-45 |
| Cox reg (vs control)  |            | 4.22E-16 |

**Table S10. Lifespan data for Figure S2e.**

| food type                                    | Mated female (♀) |              |              |            | Virgin female (♂) |              |              |           |
|----------------------------------------------|------------------|--------------|--------------|------------|-------------------|--------------|--------------|-----------|
|                                              | control          | -Amino acids | -cholesterol | -vitamins  | control           | -Amino acids | -cholesterol | -vitamins |
| Number of death                              | 97               | 100          | 99           | 99         | 95                | 97           | 94           | 95        |
| Number of censor                             | 3                | 0            | 0            | 1          | 5                 | 2            | 4            | 5         |
| median (d)                                   | 70.5             | 30.5         | 33.5         | 38         | 67.5              | 30.5         | 33.5         | 42        |
| mean (d)                                     | 70.6             | 32.8         | 34.1         | 40.4       | 65.3              | 33.9         | 35.0         | 43.7      |
| maximum (d)                                  | 81.5             | 41           | 44.5         | 50.5       | 78.5              | 47.5         | 44.5         | 56.5      |
| Cox reg (vs control)                         |                  | 1.15E-42     | 4.94E-38     | 3.44E-28   |                   | 9.27E-40     | 3.33E-35     | 1.23E-20  |
| log-rank (vs control)                        |                  | 8.04E-49     | 1.98E-47     | 1.13E-44   |                   | 6.29E-40     | 5.77E-38     | 4.50E-27  |
| log-rank (♀ vs ♂)                            |                  |              |              |            | 0.06500           | 0.37822      | 0.45305      | 0.00388   |
| Cox regression (amino acids × mating status) |                  |              |              | p = 0.107  |                   |              |              |           |
| Cox regression (cholesterol × mating status) |                  |              |              | p = 0.122  |                   |              |              |           |
| Cox regression (vitamins × mating status)    |                  |              |              | p = 0.0025 |                   |              |              |           |

**Table S11. Lifespan data for Figure S2f.**

| food type                                | Mated female (♀) |           | Virgin female (♂) |          |
|------------------------------------------|------------------|-----------|-------------------|----------|
|                                          | Control          | -sugar    | Control           | -sugar   |
| Number of death                          | 100              | 98        | 100               | 100      |
| Number of censor                         | 0                | 2         | 0                 | 0        |
| median (d)                               | 65               | 45.5      | 64                | 45.5     |
| mean (d)                                 | 66.4             | 45.4      | 63.5              | 46.5     |
| maximum (d)                              | 78               | 55        | 76                | 64       |
| Cox reg (vs control)                     |                  | 3.15E-31  |                   | 2.82E-20 |
| log-rank (vs control)                    |                  | 4.23E-41  |                   | 1.36E-24 |
| log-rank (♀ vs ♂)                        |                  |           | 0.18463           | 0.07534  |
| Cox regression (sucrose × mating status) |                  | p = 0.272 |                   |          |

**Table S12. Lifespan data for Figure S3a.**

|                       | Female  |              |              |           | Male    |              |              |           |
|-----------------------|---------|--------------|--------------|-----------|---------|--------------|--------------|-----------|
| food type             | control | -Amino acids | -cholesterol | -vitamins | control | -Amino acids | -cholesterol | -vitamins |
| Number of death       | 98      | 98           | 98           | 100       | 97      | 98           | 97           | 100       |
| Number of censor      | 0       | 0            | 0            | 0         | 2       | 1            | 2            | 1         |
| median (d)            | 60.5    | 25.5         | 33.5         | 30.5      | 45.5    | 30.5         | 48.5         | 48.5      |
| mean (d)              | 59.1    | 27.1         | 33.4         | 36.1      | 49.8    | 30.8         | 50.9         | 51.2      |
| maximum (d)           | 75.5    | 28           | 48.5         | 60.5      | 63.5    | 33.5         | 63.5         | 63.5      |
| Cox reg (vs control)  |         | 5.07E-37     | 1.37E-24     | 6.62E-19  |         | 1.82E-43     | 0.65694      | 0.28456   |
| log-rank (vs control) |         | 1.57E-40     | 7.10E-34     | 3.81E-20  |         | 2.59E-44     | 0.59601      | 0.23735   |

**Table S13. Lifespan data for Figure S3b.**

|                       | Female  |              |              |           | Male    |              |              |           |
|-----------------------|---------|--------------|--------------|-----------|---------|--------------|--------------|-----------|
| food type             | control | -Amino acids | -cholesterol | -vitamins | control | -Amino acids | -cholesterol | -vitamins |
| Number of death       | 98      | 98           | 100          | 100       | 100     | 99           | 99           | 97        |
| Number of censor      | 1       | 0            | 0            | 0         | 1       | 1            | 0            | 2         |
| median (d)            | 57.5    | 33.5         | 17           | 36.5      | 45.5    | 33.5         | 45.5         | 45.5      |
| mean (d)              | 57.8    | 37.7         | 21.3         | 39.4      | 47.6    | 35.0         | 47.1         | 47.4      |
| maximum (d)           | 69.5    | 54.5         | 38           | 60.5      | 60.5    | 39.5         | 57.5         | 59        |
| Cox reg (vs control)  |         | 1.06E-20     | 2.99E-55     | 3.67E-14  |         | 7.34E-26     | 0.51884      | 0.81505   |
| log-rank (vs control) |         | 4.94E-29     | 1.59E-46     | 5.36E-17  |         | 9.94E-25     | 0.43908      | 0.82455   |

**Table S14. Lifespan data for Figure S4b.**

| food type                                                                          | +/+ female |              |              |           | +/+ male   |              |              |           | +/ovo <sup>D1</sup> female |              |              |           |
|------------------------------------------------------------------------------------|------------|--------------|--------------|-----------|------------|--------------|--------------|-----------|----------------------------|--------------|--------------|-----------|
|                                                                                    | control    | -Amino acids | -cholesterol | -vitamins | control    | -Amino acids | -cholesterol | -vitamins | control                    | -Amino acids | -cholesterol | -vitamins |
| Number of death                                                                    | 100        | 99           | 100          | 96        | 100        | 100          | 100          | 100       | 100                        | 100          | 100          | 100       |
| Number of censor                                                                   | 0          | 1            | 0            | 4         | 0          | 0            | 0            | 0         | 0                          | 0            | 0            | 0         |
| median (d)                                                                         | 75         | 27           | 34.5         | 38        | 56.5       | 37           | 59           | 60        | 77.5                       | 53.5         | 66           | 62        |
| mean (d)                                                                           | 74.6       | 30.0         | 35.1         | 41.2      | 58.5       | 37.9         | 61.2         | 60.6      | 78.4                       | 55.1         | 66.6         | 61.8      |
| maximum (d)                                                                        | 86         | 31.5         | 49           | 61        | 70.5       | 39           | 75           | 73        | 89                         | 73           | 79           | 82        |
| Cox reg (vs control)                                                               |            | 4.57E-52     | 4.32E-39     | 7.39E-31  |            | 2.28E-38     | 0.16735      | 0.34955   |                            | 2.52E-29     | 1.36E-9      | 5.62E-13  |
| log-rank (vs control)                                                              |            | 1.81E-51     | 1.85E-51     | 1.99E-46  |            | 2.85E-47     | 0.12102      | 0.29790   |                            | 1.62E-36     | 2.14E-15     | 8.84E-16  |
| log-rank (vs +/+ female)                                                           |            |              |              |           | 7.32E-26   | 4.83E-27     | 2.16E-43     | 2.85E-22  | 0.00229                    | 2.76E-40     | 1.36E-45     | 3.77E-22  |
| log-rank (vs +/+ male)                                                             |            |              |              |           |            |              |              |           | 1.28E-35                   | 9.41E-34     | 4.60E-06     | 0.02110   |
| +/+ female vs +/ovo <sup>D1</sup> females: Cox regression (amino acids x genotype) |            |              |              |           | p < 0.0001 |              |              |           |                            |              |              |           |
| +/+ female vs +/ovo <sup>D1</sup> females: Cox regression (cholesterol x genotype) |            |              |              |           | p < 0.0001 |              |              |           |                            |              |              |           |
| +/+ female vs +/ovo <sup>D1</sup> females: Cox regression (vitamins x genotype)    |            |              |              |           | p < 0.0001 |              |              |           |                            |              |              |           |
| +/+ female vs +/+ males: Cox regression (amino acids x gender)                     |            |              |              |           | p < 0.0001 |              |              |           |                            |              |              |           |
| +/+ female vs +/+ males: Cox regression (cholesterol x gender)                     |            |              |              |           | p < 0.0001 |              |              |           |                            |              |              |           |
| +/+ female vs +/+ males: Cox regression (vitamins x gender)                        |            |              |              |           | p < 0.0001 |              |              |           |                            |              |              |           |

**Table S15. Lifespan data for Figure S4c.**

|                                                                                | +/+ female |          | +/+ male |            | +/ovo <sup>D1</sup> female |          |
|--------------------------------------------------------------------------------|------------|----------|----------|------------|----------------------------|----------|
| food type                                                                      | Control    | -sucrose | Control  | -sucrose   | Control                    | -sucrose |
| Number of death                                                                | 100        | 98       | 97       | 100        | 100                        | 100      |
| Number of censor                                                               | 0          | 2        | 3        | 0          | 0                          | 0        |
| median (d)                                                                     | 70         | 50       | 54.5     | 34         | 76                         | 62       |
| mean (d)                                                                       | 70.6       | 51.2     | 57.6     | 36.2       | 76.6                       | 64.2     |
| maximum (d)                                                                    | 83         | 67       | 71.5     | 47         | 88                         | 80       |
| Cox reg (vs control)                                                           |            | 5.13E-25 |          | 5.44E-32   |                            | 8.67E-13 |
| log-rank (vs control)                                                          |            | 2.09E-31 |          | 4.39E-42   |                            | 1.81E-15 |
| log-rank (vs +/+ female)                                                       |            |          | 2.29E-19 | 6.36E-25   | 6.91E-06                   | 9.30E-15 |
| log-rank (vs +/+ male)                                                         |            |          |          |            | 1.84E-32                   | 2.99E-48 |
| +/+ female vs +/ovo <sup>D1</sup> females: Cox regression (sucrose × genotype) |            |          |          | p = 0.0002 |                            |          |
| +/+ female vs +/+ males: Cox regression (sucrose × gender)                     |            |          |          | p = 0.0049 |                            |          |





**Table S17. Lifespan data for Figure S4e.**

| food type                | +/+ female |           | +/+ male |           | +/ovo <sup>D1</sup> female |           |
|--------------------------|------------|-----------|----------|-----------|----------------------------|-----------|
|                          | Control    | -vitamins | Control  | -vitamins | Control                    | -vitamins |
| Number of death          | 99         | 100       | 100      | 99        | 100                        | 100       |
| Number of censor         | 1          | 0         | 0        | 1         | 0                          | 0         |
| median (d)               | 70.5       | 29        | 53.5     | 50.5      | 75                         | 50.5      |
| mean (d)                 | 69.0       | 30.9      | 55.1     | 52.1      | 76.0                       | 52.4      |
| maximum (d)              | 82         | 47        | 68       | 67        | 84.5                       | 74        |
| Cox reg (vs control)     |            | 7.36E-32  |          | 0.07340   |                            | 1.76E-24  |
| log-rank (vs control)    |            | 2.38E-49  |          | 0.04379   |                            | 2.32E-30  |
| log-rank (vs +/+ female) |            |           | 2.50E-21 | 1.15E-33  | 5.13E-05                   | 5.22E-29  |
| log-rank (vs +/+ male)   |            |           |          |           | 1.50E-42                   | 0.09126   |

**Table S18. Lifespan data for Figure S4f.**

| food type                | +/+ female |         | +/+ male |          | +/ovo <sup>D1</sup> female |          |
|--------------------------|------------|---------|----------|----------|----------------------------|----------|
|                          | Control    | -CMIUM  | Control  | -CMIUM   | Control                    | -CMIUM   |
| Number of death          | 99         | 100     | 100      | 98       | 100                        | 100      |
| Number of censor         | 1          | 0       | 0        | 0        | 0                          | 0        |
| median (d)               | 70.5       | 66      | 53.5     | 53.5     | 75                         | 74       |
| mean (d)                 | 69.0       | 65.8    | 55.1     | 54.0     | 76.0                       | 74.7     |
| maximum (d)              | 82         | 80      | 68       | 66       | 84.5                       | 82       |
| Cox reg (vs control)     |            | 0.03557 |          | 0.64039  |                            | 0.50707  |
| log-rank (vs control)    |            | 0.01903 |          | 0.60151  |                            | 0.43956  |
| log-rank (vs +/+ female) |            |         | 2.50E-21 | 1.18E-15 | 5.13E-05                   | 9.08E-09 |
| log-rank (vs +/+ male)   |            |         |          |          | 1.50E-42                   | 3.00E-39 |

**Table S19. Lifespan data for Figure S5b-d.**

| food type                | +/+ female |              |              |           | +/+ male |              |              |           | +/OVO <sup>D1</sup> female |              |              |           |
|--------------------------|------------|--------------|--------------|-----------|----------|--------------|--------------|-----------|----------------------------|--------------|--------------|-----------|
|                          | control    | -Amino acids | -cholesterol | -vitamins | control  | -Amino acids | -cholesterol | -vitamins | control                    | -Amino acids | -cholesterol | -vitamins |
| Number of death          | 86         | 100          | 97           | 99        | 100      | 100          | 98           | 100       | 78                         | 97           | 84           | 94        |
| Number of censor         | 0          | 0            | 1            | 0         | 0        | 0            | 2            | 0         | 0                          | 1            | 2            | 0         |
| median (d)               | 62         | 32           | 32           | 39        | 48       | 34           | 48           | 48        | 67                         | 50.5         | 62           | 46        |
| mean (d)                 | 51.9       | 34.8         | 35.5         | 41.3      | 50.7     | 35.3         | 49.9         | 49.5      | 51.7                       | 51.4         | 52.3         | 44.1      |
| maximum (d)              |            | 46           | 53           | 59.5      | 64.5     | 39           | 59.5         | 62        |                            | 67           |              |           |
| log-rank (vs control)    |            | 1.81E-44     | 1.13E-42     | 8.70E-31  |          | 4.13E-45     | 0.49032      | 0.31239   |                            | 2.80E-26     | 0.00421      | 5.74E-21  |
| log-rank (vs +/+ female) |            |              |              |           |          | 0.27358      | 4.18E-17     | 4.01E-06  |                            | 1.50E-33     | 4.38E-42     | 1.32E-05  |
| log-rank (vs +/+ male)   |            |              |              |           |          |              |              |           |                            | 1.05E-46     | 4.06E-24     | 0.59285   |
